# Supplementary material for: IgM-Enriched Immunoglobulin Attenuates Systemic Endotoxin Activity in Early Severe Sepsis: A Before-After Cohort Study
Source: PLOS journal article supplement (doi:10.1371/journal.pone.0160907), 2016-08-09
Supplement: S2 (10.1371/journal.pone.0160907.s002) [file journal.pone.0160907.s002.PDF]

Zentrum der Pharmakologie

Institut für Klinische Pharmakologie  
Direktor: Prof. Dr. Dr. G. Geißlinger

PLOS ONE  
Managing Editor  
Ms Iratxe Puebla

Prof. Dr. med. Sebastian Harder  
Arzt für Klinische Pharmakologie

e-mail  
Harder@em.uni-frankfurt.de

Telefon (Durchwahl)  
069/6301-6423

Telefax  
069/6301-83921

Datum  
25.05.2016

**PONE-D-16-07587: “IgM-enriched immunoglobulin attenuates systemic endotoxin activity in early severe sepsis: A Before-After Cohort Study”**

Dear Ms Iratxe Puebla, dear editorial board,

Herewith I confirm that the protocol underlying the submitted manuscript stated above has been reviewed and approved pre-study by the Institutional Review Board of the Medical Faculty of the Goethe-University Frankfurt (decision number: 67/12, file number 122/12). Furthermore the protocol is in accordance to the Clinical Trial Registration Nr. NCT02444871.

Best regards



Prof. Dr. Sebastian Harder  
Vorsitzender der Ethikkommission  
des Fachbereiches Medizin  
der Goethe Universität Frankfurt
